# Supplementary material for: Plant-insect interactions patterns in three European paleoforests of the late-Neogene—early-Quaternary
Source: PeerJ journal article supplement (doi:10.7717/peerj.5075), 2018-06-20

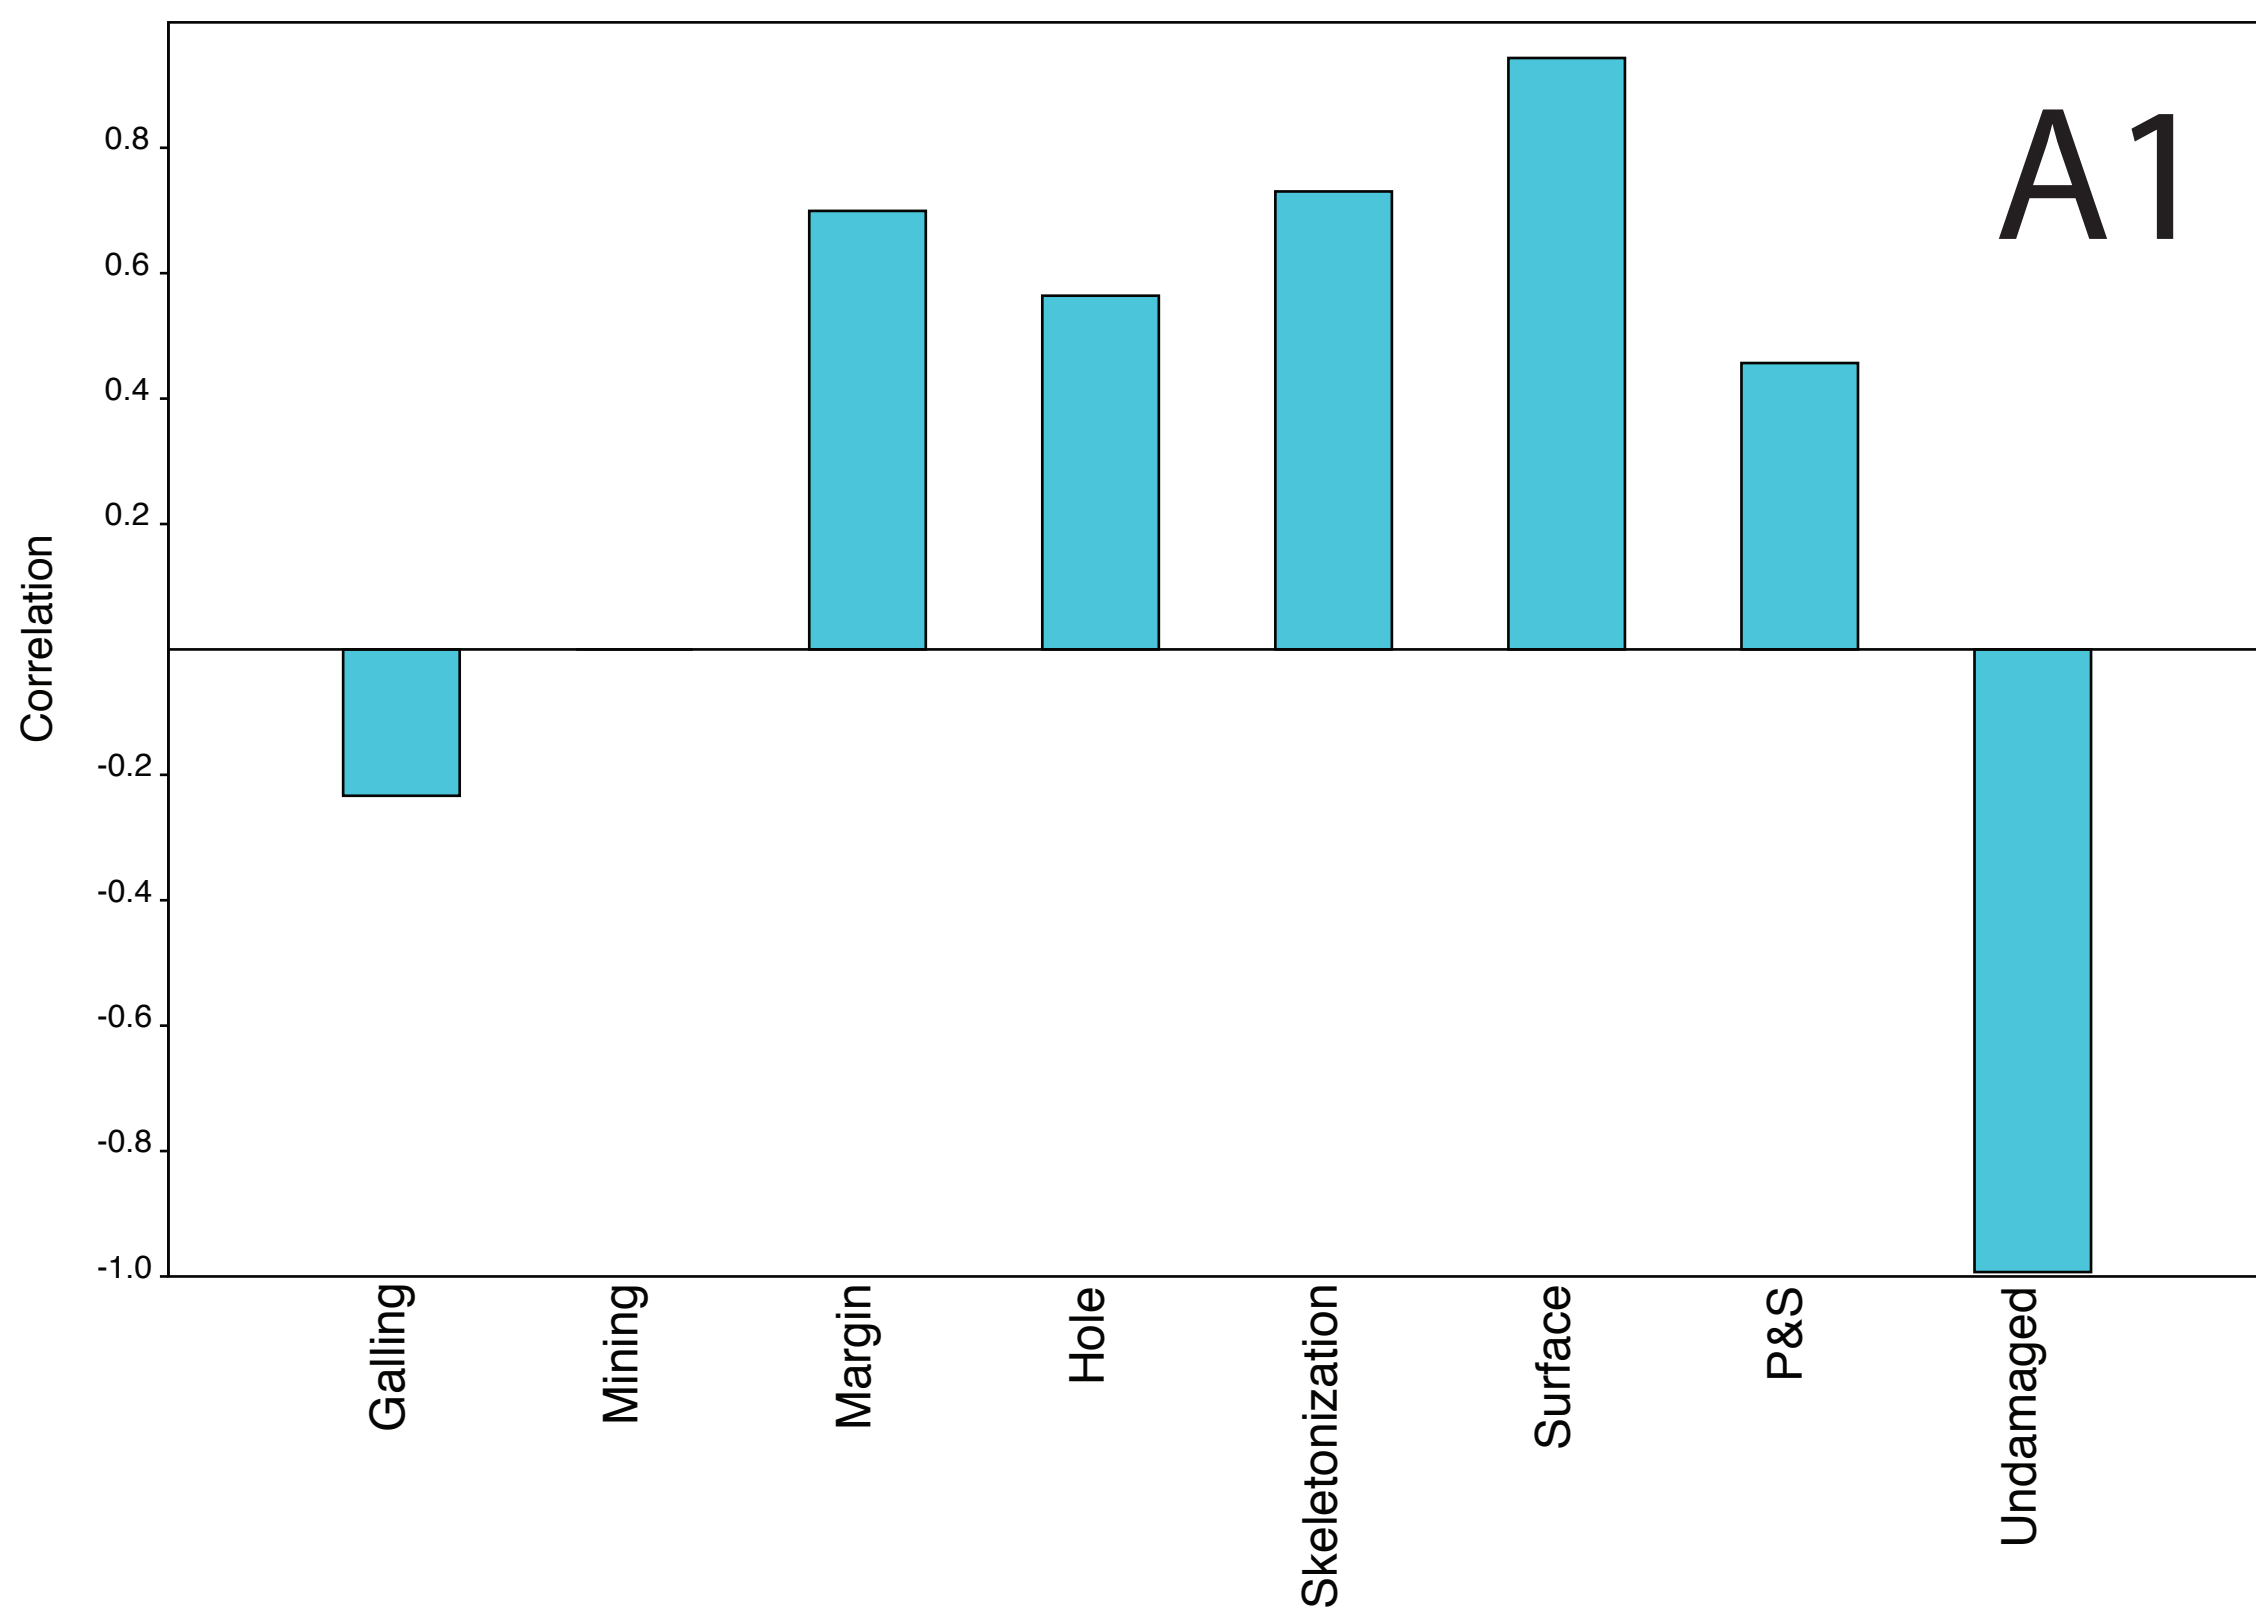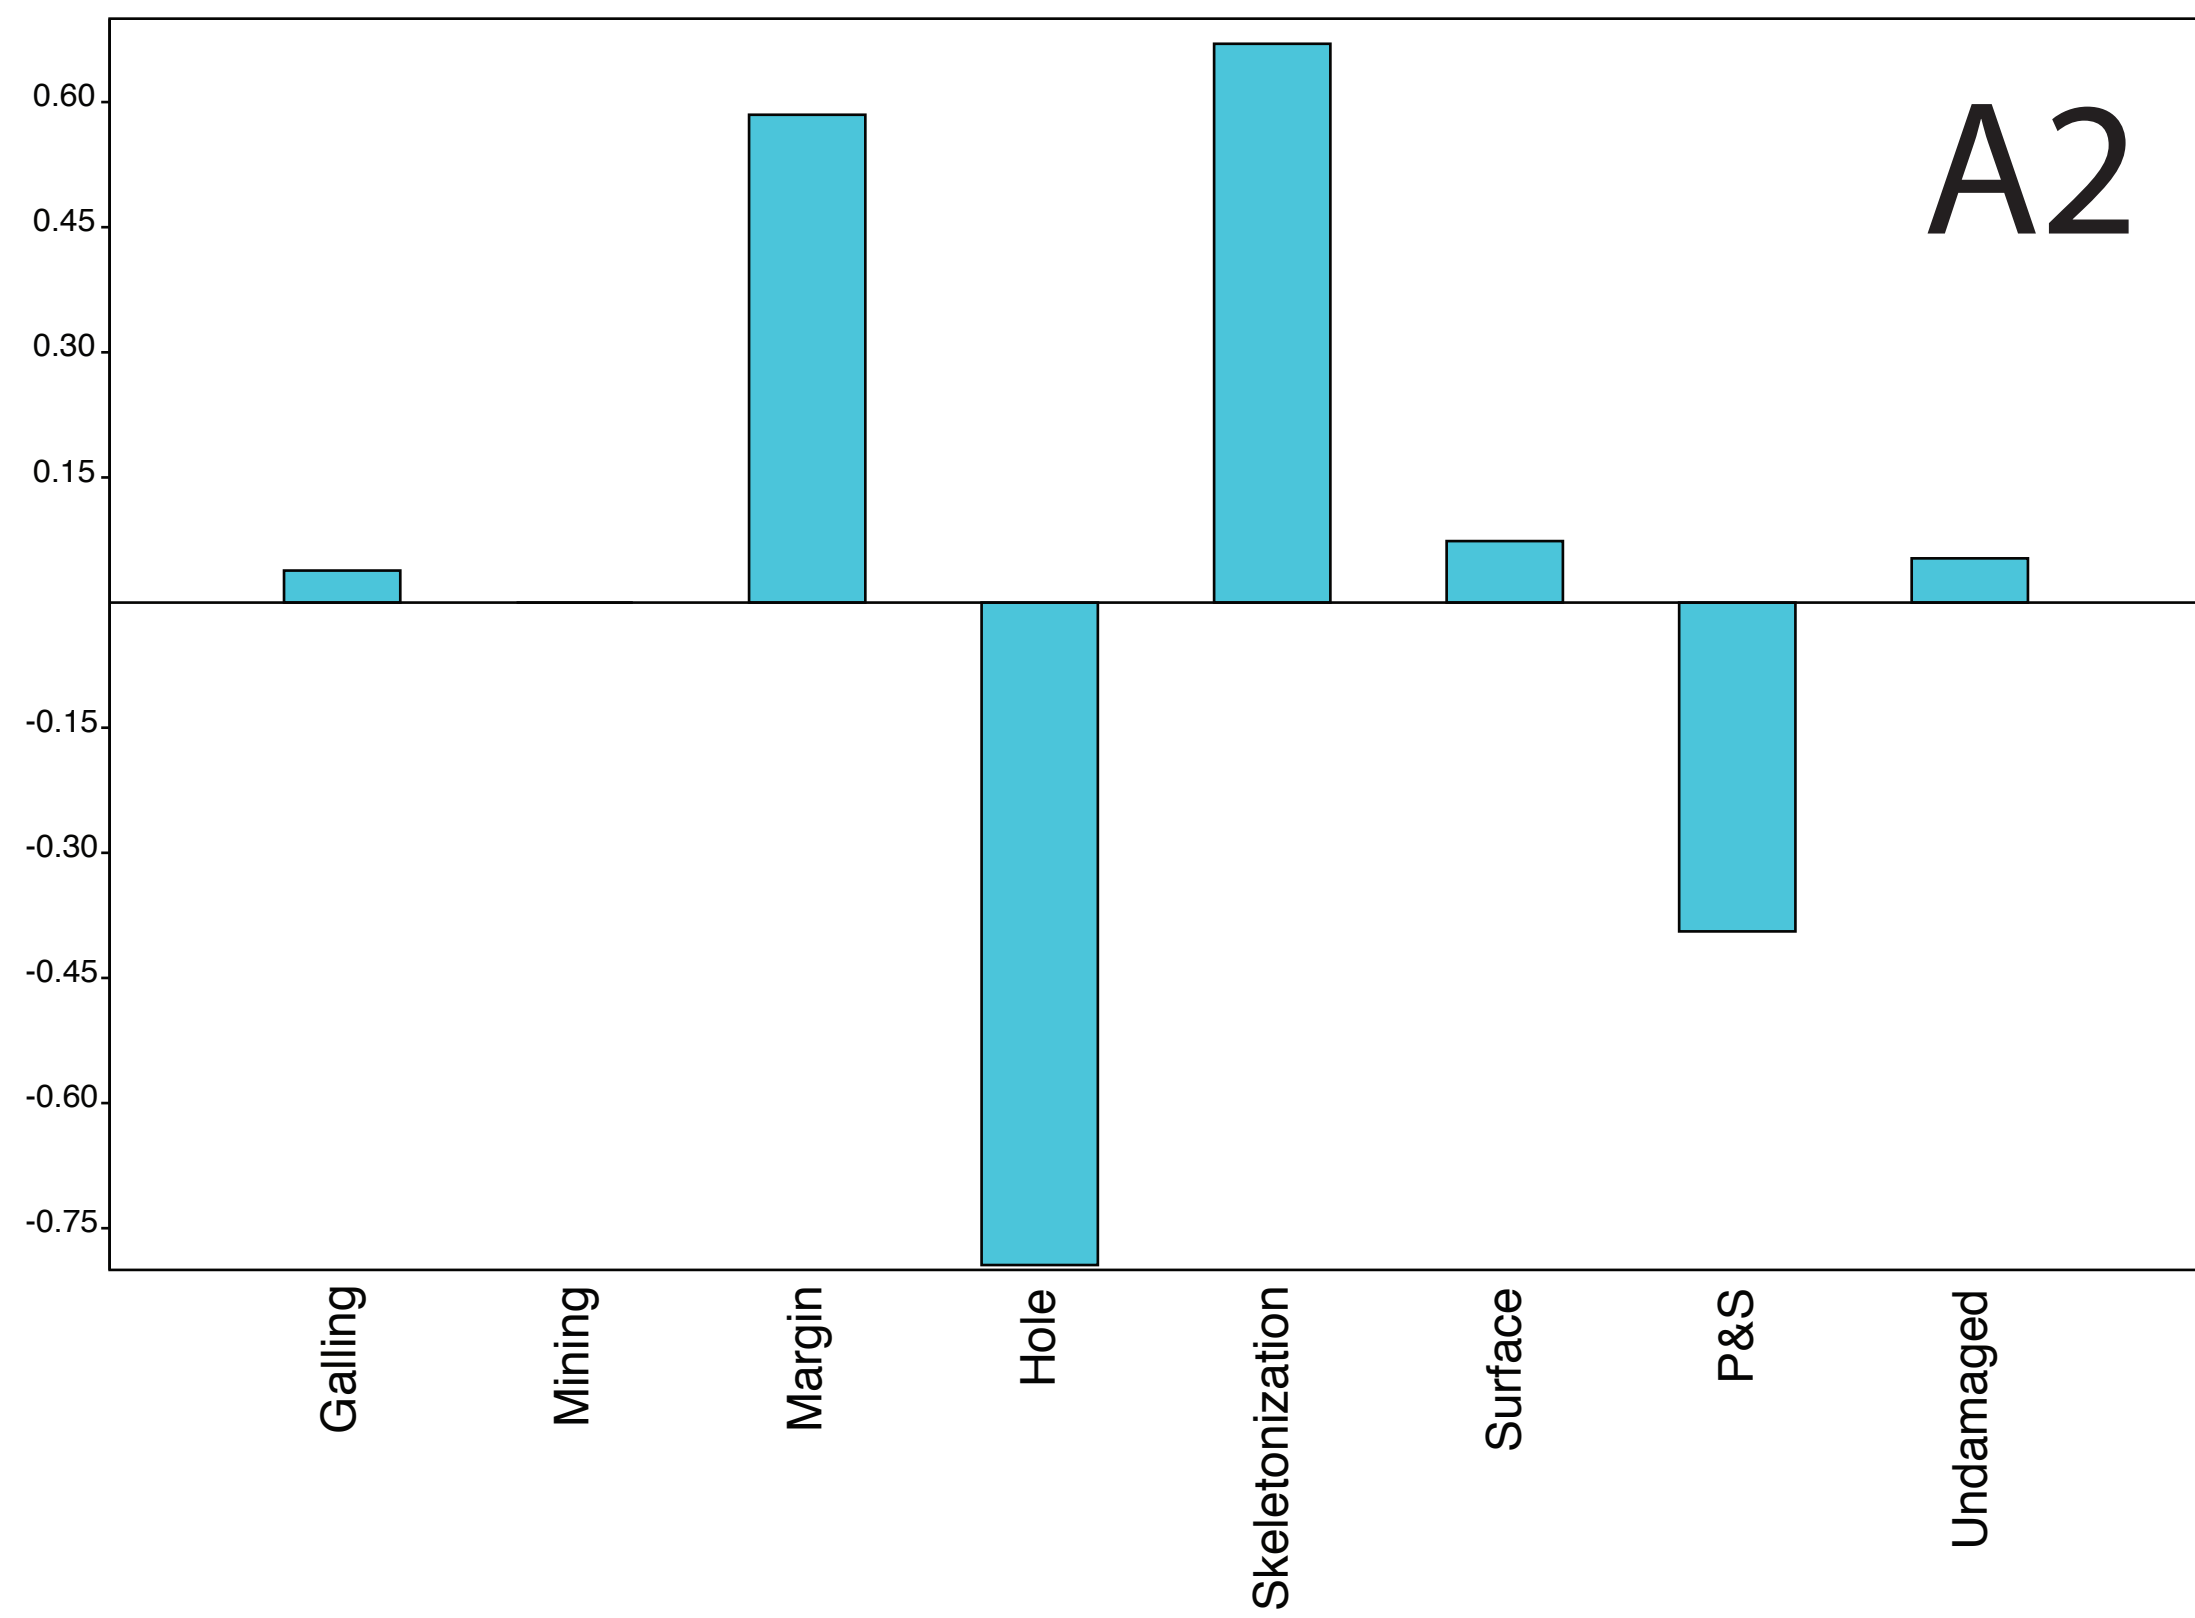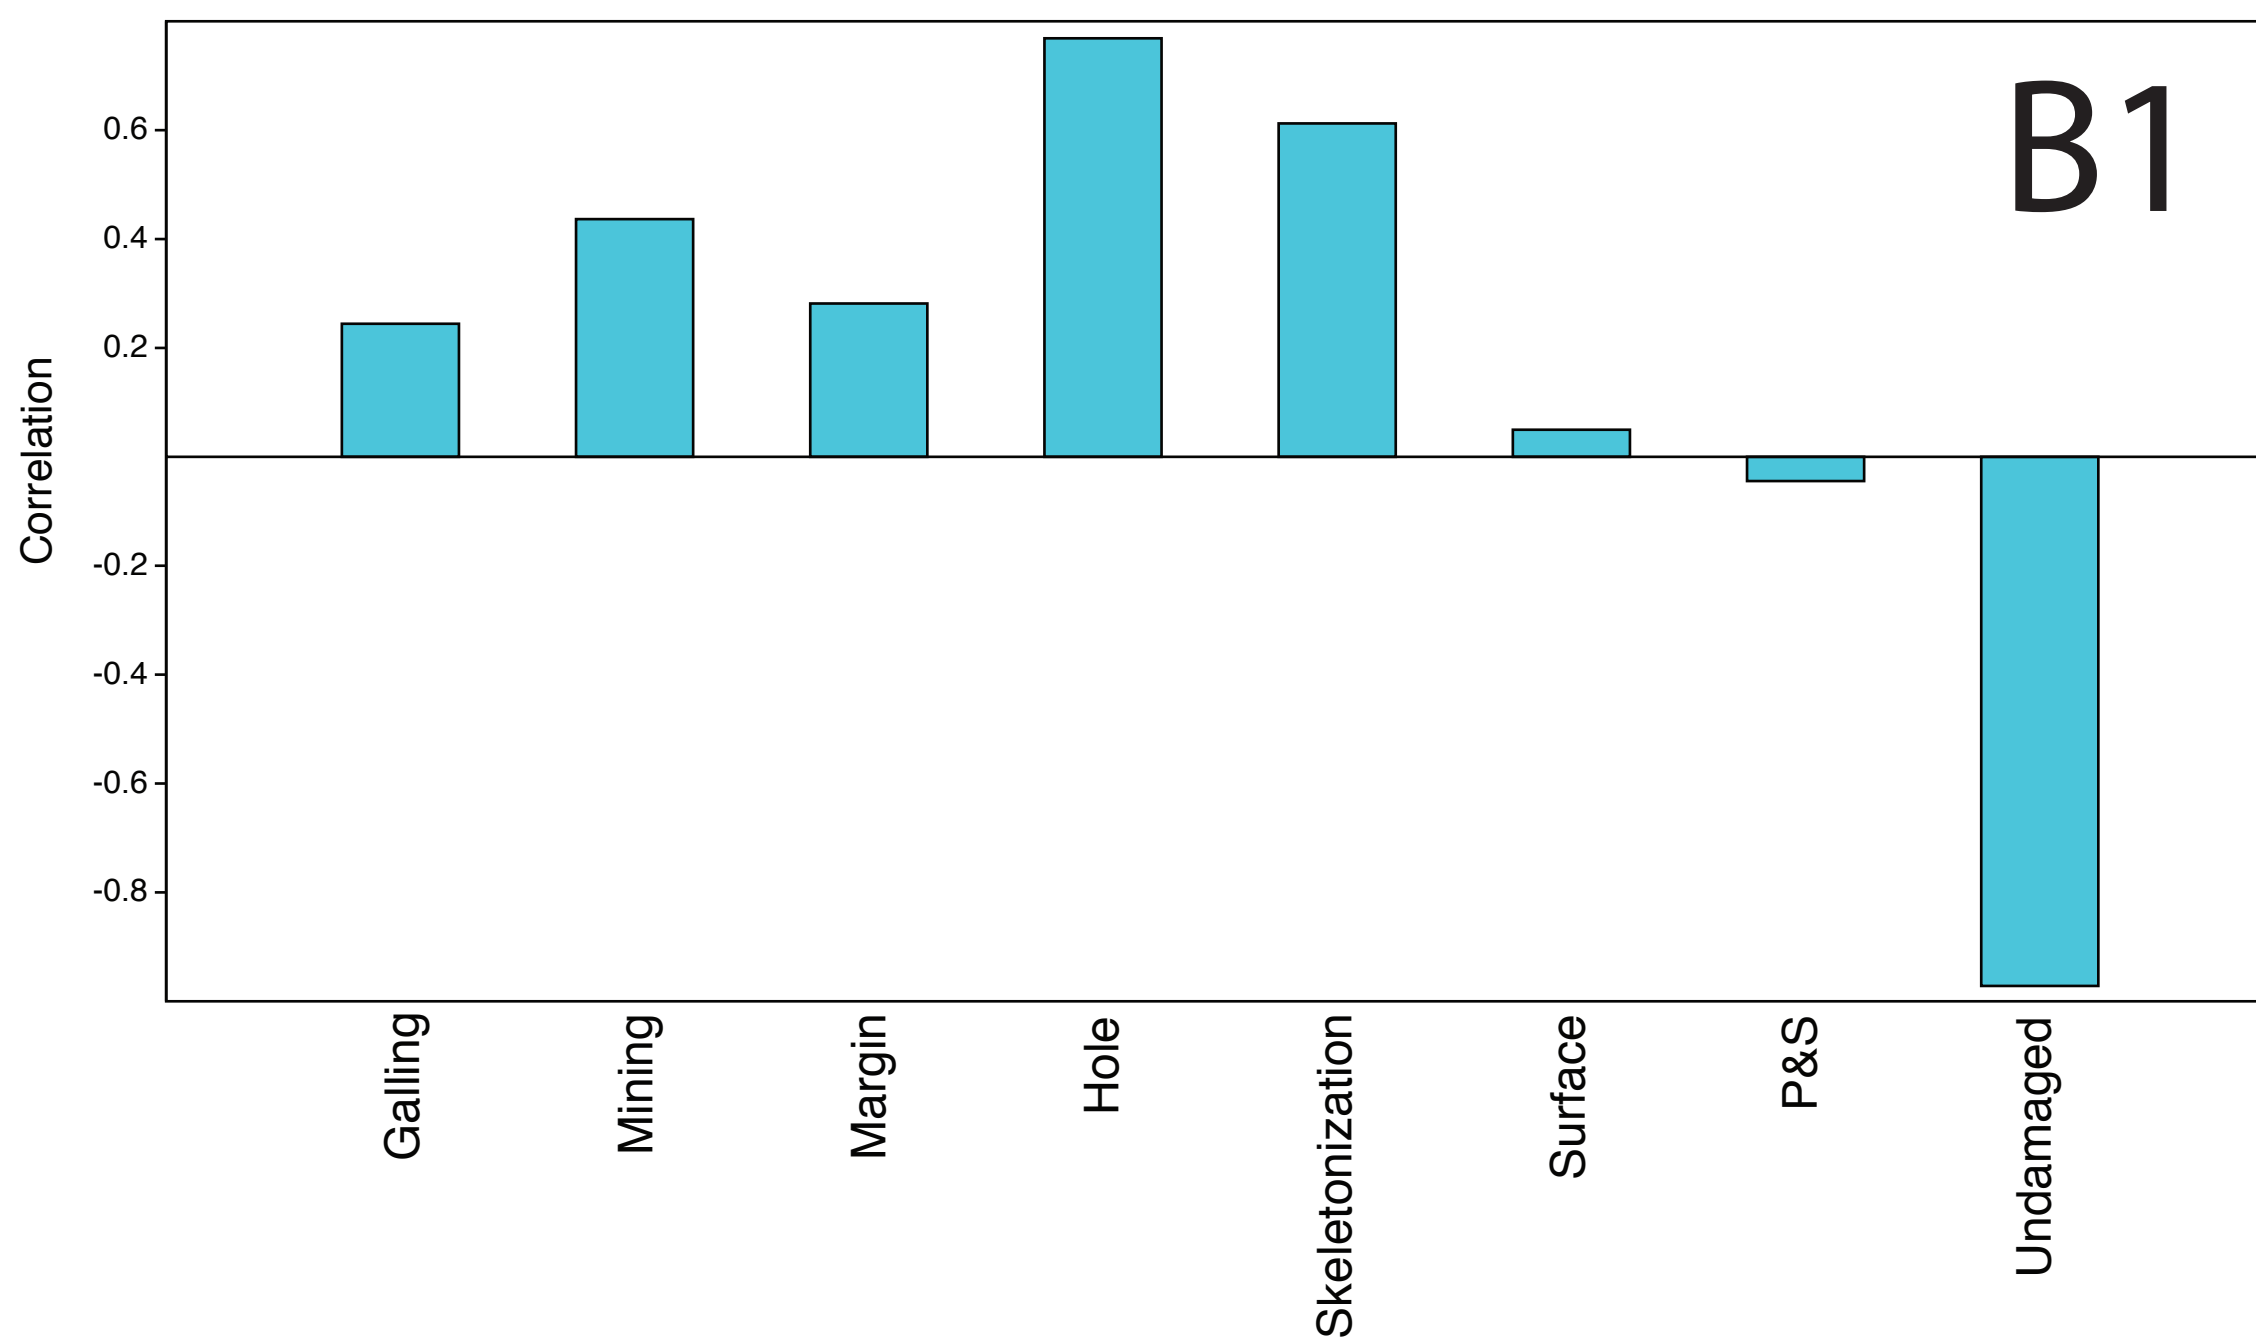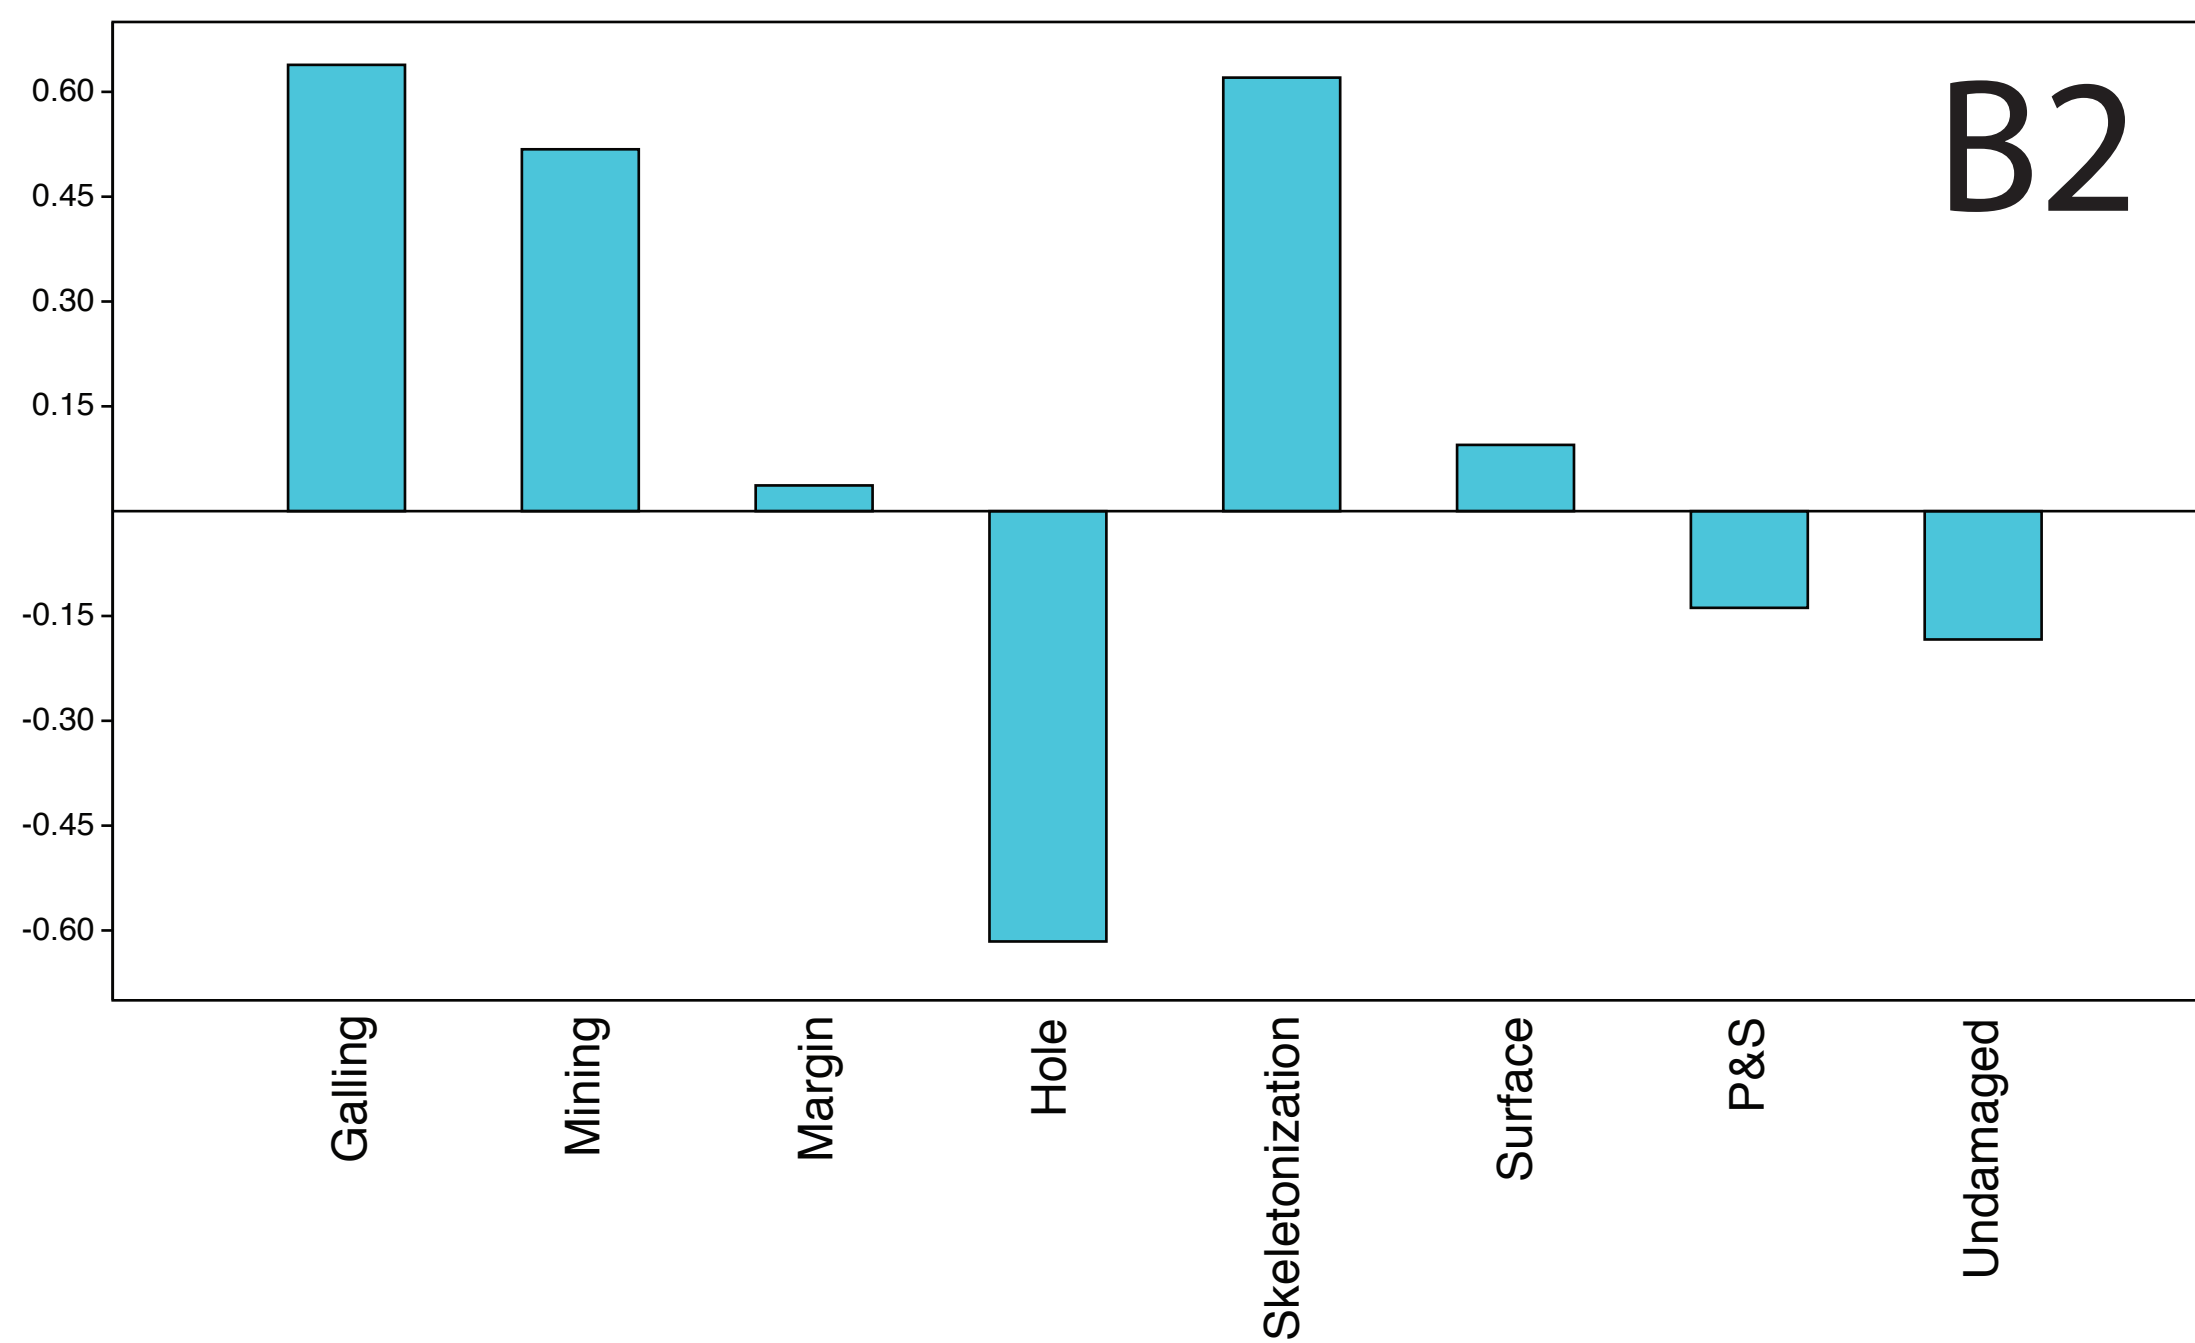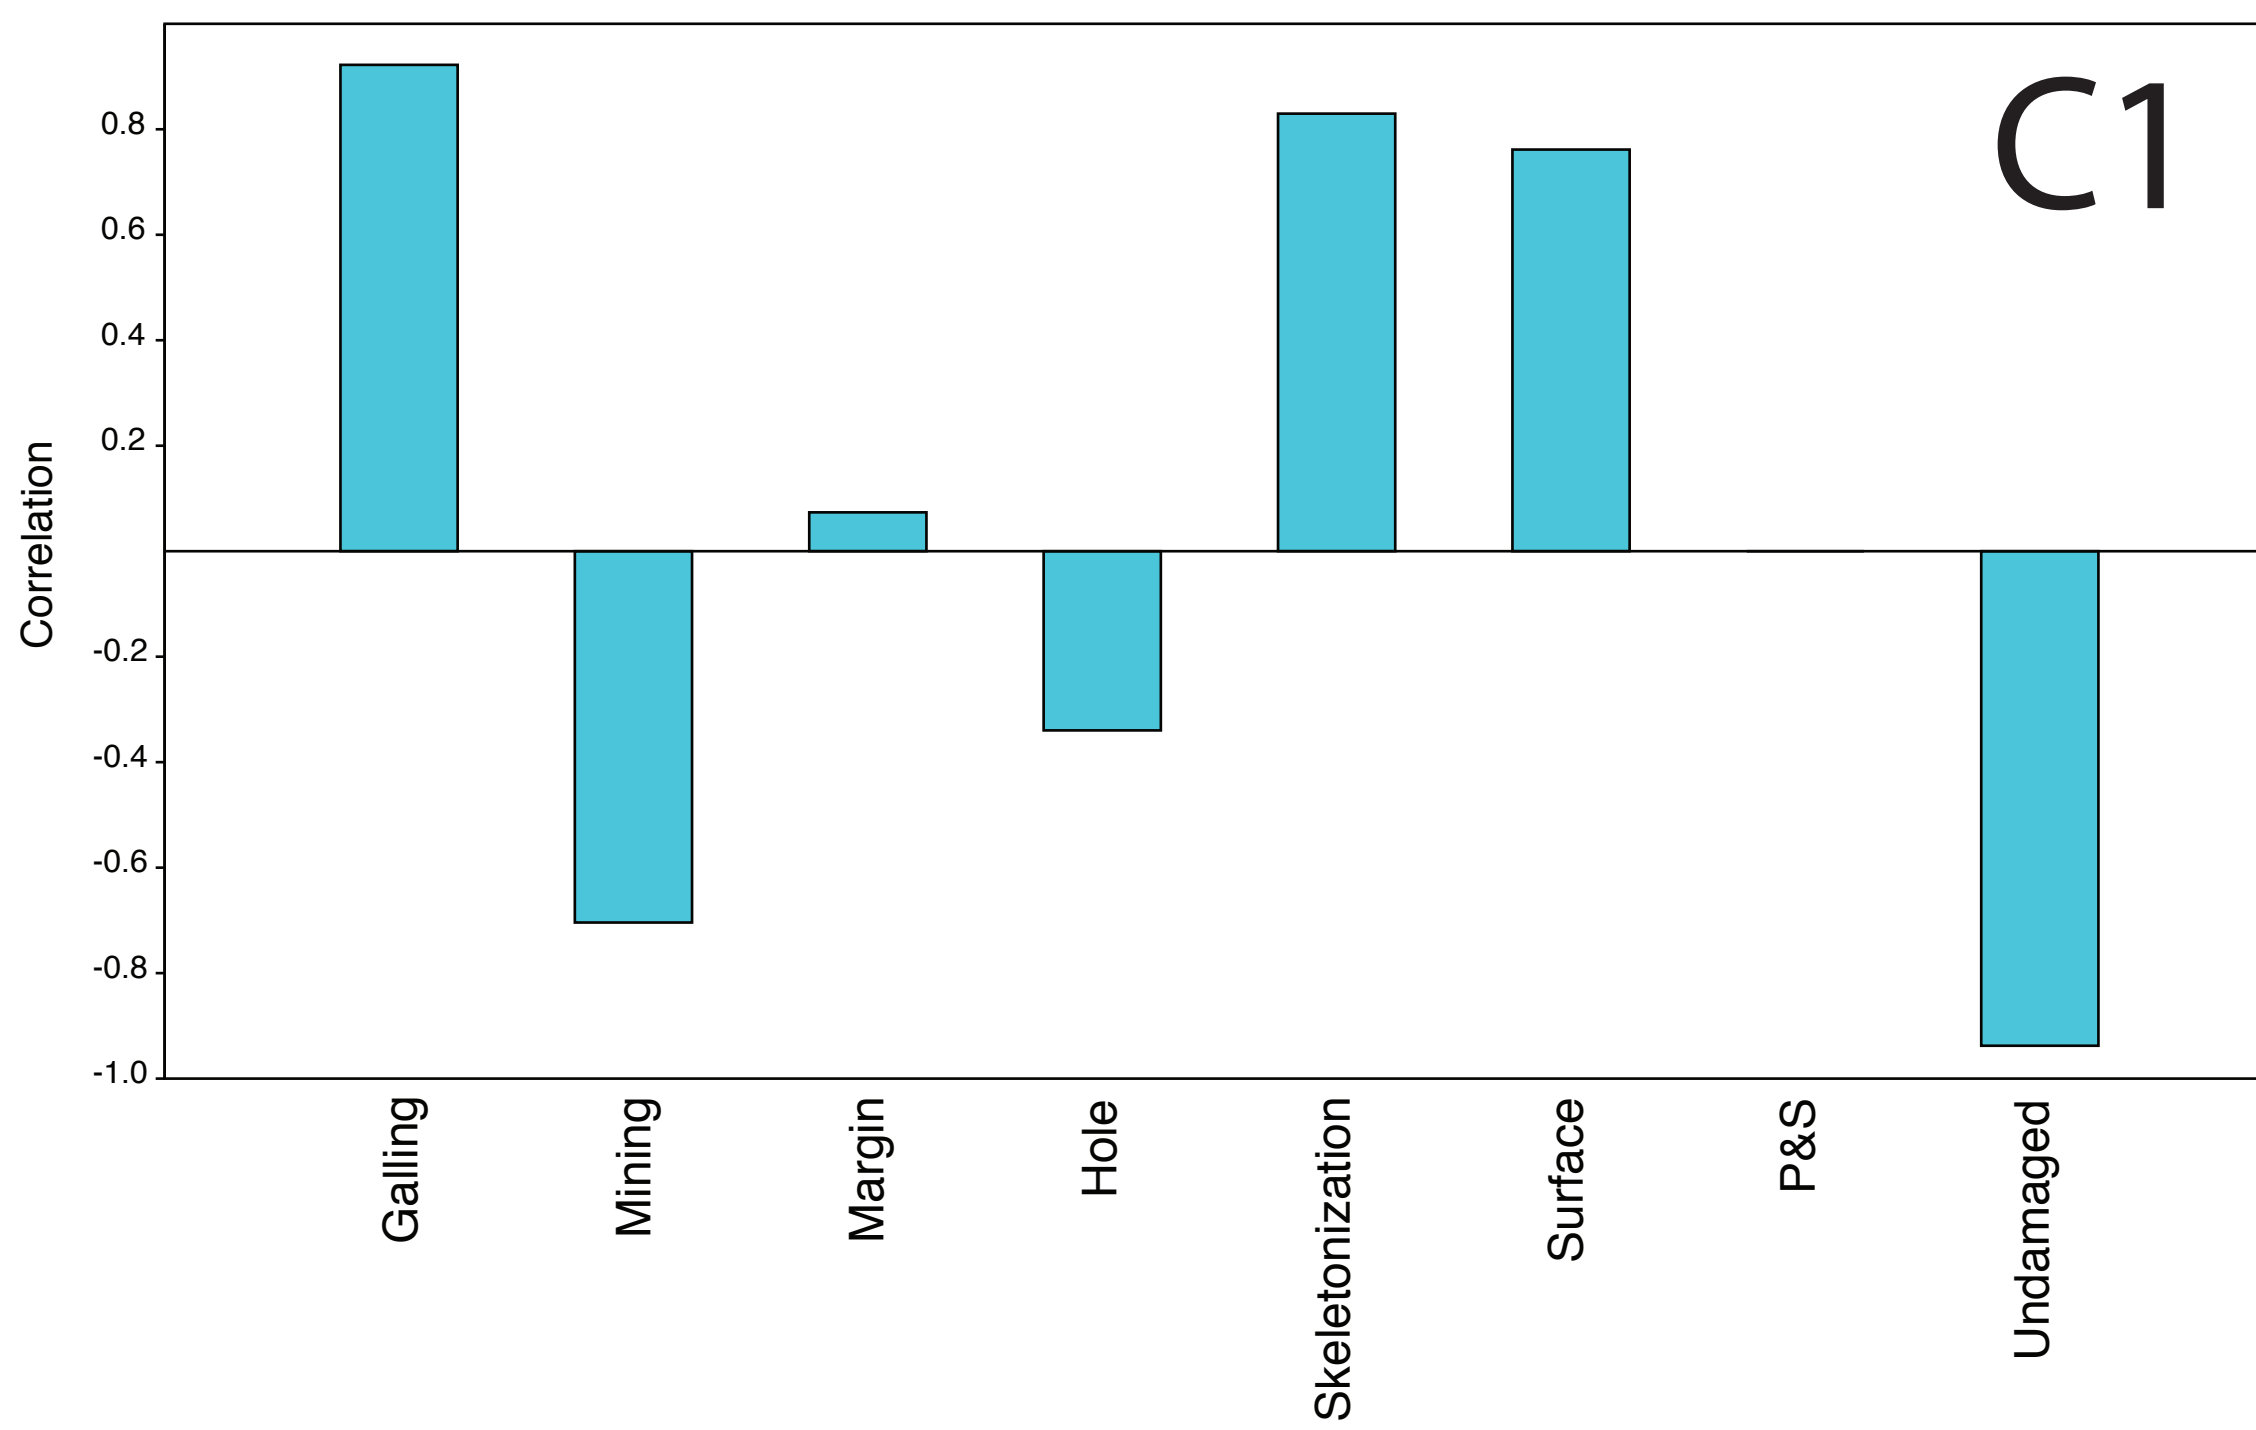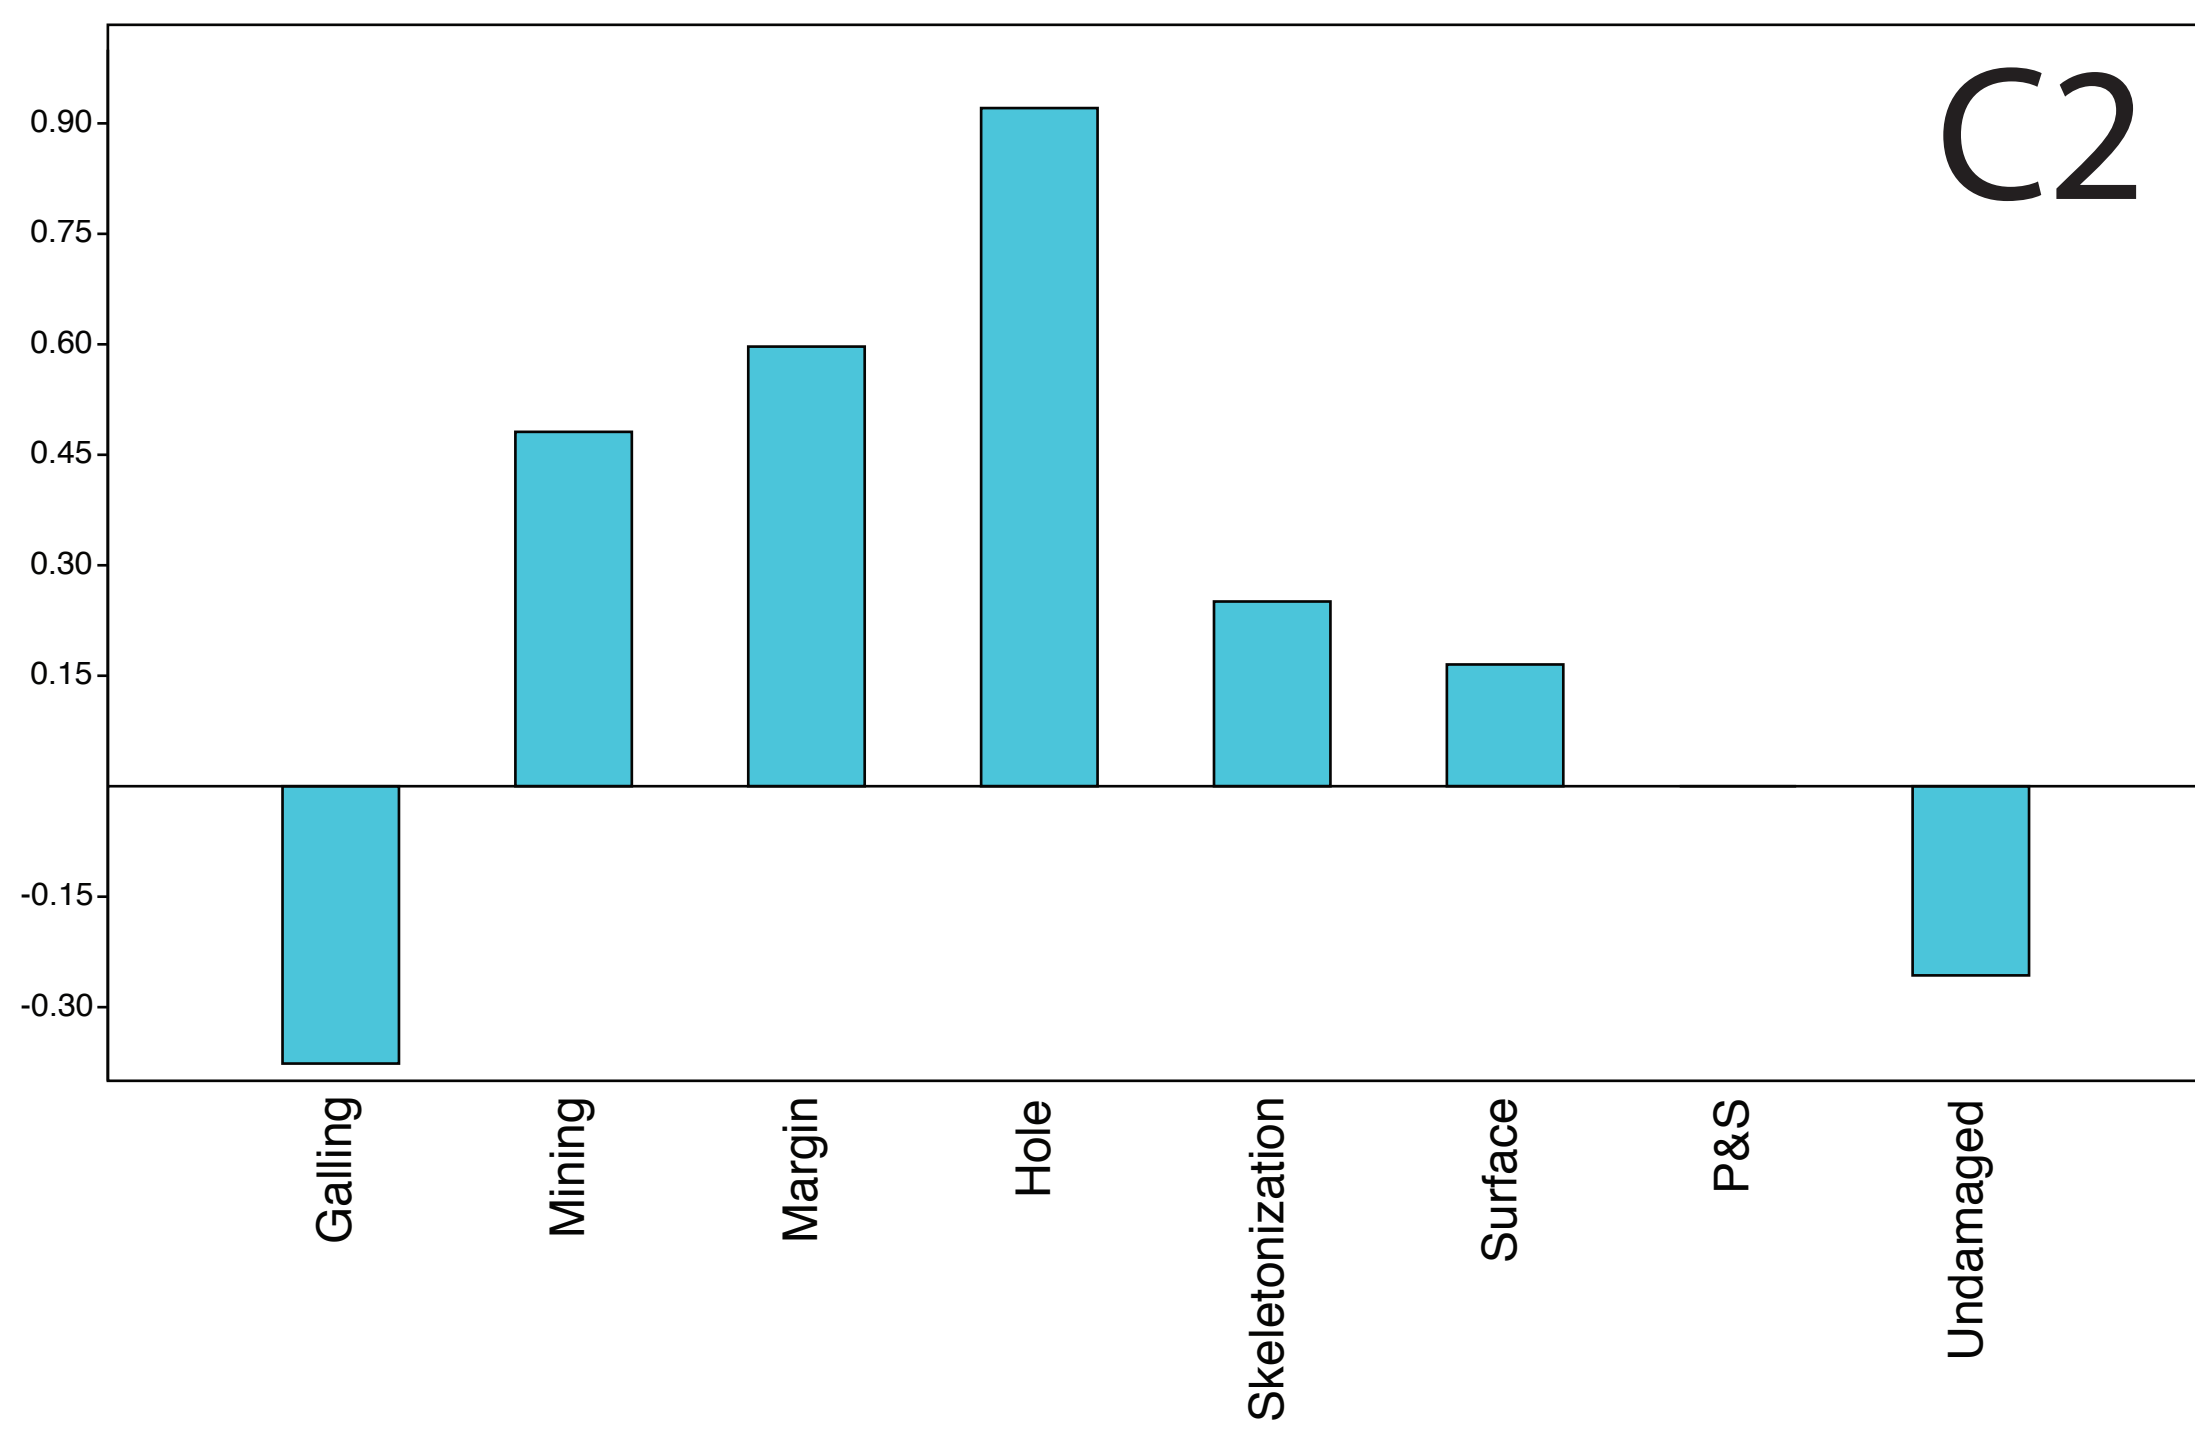

Supplement: Data_S1.pdf [file Data_S1.pdf]
