# Supplementary material for: Plant-insect interactions patterns in three European paleoforests of the late-Neogene—early-Quaternary
Source: PeerJ. 2018 Jun 20;6:e5075. doi: 10.7717/peerj.5075 (PMC6015487; doi:10.7717/peerj.5075)
Supplement: Supplemental Information 3 — Results are expressed in percent. The plant species with less than 20 specimens were taken into account for the plant species richness and the general result of FFGs in each fossil leaf assemblages. In Willershausen (Germany, late Pliocene) the non-statistical species are: Populus monilifera, Acer opalus, Fagus pliocenica, Fraxinus ornu, Carya serrifolia, Prunus avium, Sassafras ferretianum, Juglandaceae sp1, Sorbus praetorminalis, Sorbus torminalis, Carpinus sp, Cedrela heliconia, Quercus petraea, Zelkova sp, Carya alba, Ampelopsis cordataeformis, Berberis sp, Rhamnus saxatilis, Acer platanoides, Celtis sp, Hedera helix, Malus sp, Corylus sp, Liriodendron procaccinii, Populus aff populina, Acer opulifolium, Alnus glutinosa, Crataegus oxyacantha, Persea brauni, Philadelphus sp, Crataegus sp, Populus cf catalpa, Potamogeto sp, Sorbus sp, Alnus viridis, Paulownia catalpa, Physocarpus opulifolius, Potamogeton crispus, Pterocarya sp, Tilia alba, Acer italum, Buxus sempervirens, Cercidiohyllum crenatum, Hedera sp, Nyssa sp, Quercus alba, Quercus cerris, Quercus pretaera iberica, Aristolochia pliocenica, Celtis trachytica, Ceratophyllum, Fraxinus pliocenica, Phellodendron sp, Quercus schweitzerii, Rosa sp, Sassafras sp, Betula luminifera, Cercidiphyllum sp, Juglans acuminata, Najas marina, Pistacia sp, Pyracantha coccinea, Quercus cedrorum, Sorrbus grabbrensis, Ulmus longifolia, Acer decipiens, Aesculus pavia, Carya porcina, Leguminosites sp1, Potamogeton acutifolius, Potamogeton perfoliatus, Rhus typhina, Ribes sp, Torreya nucifera, Aesculus sp1, Aesculus sp2, Aesculus sp3, Alnus angustissima, Alnus incana, Alnus sp4, Ampelopsis sp, Buxus sp, Caranaga sp1, cf Magnolia sp, Comptonia acutiloba, Cotinus aff coccygea, Diospyros sp, Epimedium sp, Equiselum schmidtii, Fagus cf orientalis, Fraxinus exceloior, Glyptostrobus europaeus, Hedera multinervig, Kerria sp, Koelreuteria sp, Populus seinensis, Potamogeton comprensis, Potamogeton densus, Potamogeton pertina, Prunus spinosa [file peerj-06-5075-s003.xlsx]

## Sheet: Feuil1
Outcrops	Species	Leaves	Damaged	Specialized	Gall	Mine	External_Spz	Generalist	MarginF	HoleF	Skeleton	SurfaceF	P&S
Willershausen	Zelkova_ungeri	948	0.449	0.06	0.052	0.004	0.0042	0.403	0.086	0.228	0.12	0.014	0.005
	Fagus_sylvatica	549	0.492	0.084	0.067	0.009	0.0146	0.439	0.077	0.302	0.113	0.009	0.011
	Parrotia_persica	517	0.712	0.282	0.133	0.108	0.0155	0.509	0.099	0.263	0.257	0.033	0.01
	Quercus_praeerucifolia	322	0.478	0.096	0.081	0.003	0.0031	0.41	0.075	0.233	0.14	0.006	0.016
	Carpinus_orientalis	206	0.388	0.092	0.063	0.015	0.0146	0.306	0.092	0.233	0.015	0.015	0.01
	Carpinus_grandis	176	0.449	0.057	0.045	0	0.0057	0.409	0.085	0.301	0.04	0.011	0.006
	Carpinus_betulus	173	0.405	0.069	0.058	0.006	0	0.353	0.052	0.243	0.075	0.006	0.006
	Betula_maximowicziana	164	0.518	0.116	0.085	0.006	0.0061	0.439	0.03	0.372	0.049	0.024	0.03
	cf_Magnolia_sp1	121	0.521	0.157	0.107	0.025	0.0083	0.372	0.074	0.198	0.157	0.008	0
	Acer_integerrimum	107	0.701	0.168	0.084	0.019	0.0374	0.598	0.196	0.383	0.15	0.009	0.047
	Fagus_grandifolia	100	0.57	0.09	0.06	0.01	0.01	0.51	0.14	0.32	0.15	0	0.02
	Ulmus_carpinifolia	94	0.713	0.096	0.053	0.021	0.0106	0.649	0.117	0.415	0.191	0.032	0.011
	Carya_minor	90	0.533	0.089	0.078	0	0	0.467	0.178	0.233	0.111	0.022	0.011
	cf_Magnolia_sp2	81	0.506	0.21	0.148	0.062	0.0123	0.346	0.148	0.16	0.086	0.012	0
	Quercus_macranthera	79	0.519	0.025	0	0	0.0127	0.494	0.063	0.418	0.101	0.013	0.013
	Populus_tremula	72	0.5	0.069	0.069	0	0.0278	0.458	0.139	0.264	0.111	0.028	0
	Acer_laetum	68	0.456	0.103	0.074	0.015	0.0147	0.368	0.103	0.162	0.176	0.015	0
	Sorbus_domestica	68	0.397	0.059	0.029	0.015	0.0147	0.338	0.147	0.191	0.074	0.029	0.015
	Alnus_spaethii	66	0.439	0.136	0.106	0.015	0	0.348	0.045	0.288	0	0.015	0.015
	cf_Toona	65	0.538	0.108	0.062	0.015	0.0154	0.446	0.169	0.277	0.062	0.062	0.015
	Betula_lenta	64	0.563	0.094	0.094	0	0	0.484	0.031	0.422	0.063	0	0
	Populus_willershausensis	63	0.492	0.143	0.095	0	0	0.397	0.048	0.286	0.159	0	0.016
	Malus_pulcherrima	59	0.525	0.153	0.085	0.017	0.0169	0.441	0.034	0.288	0.085	0.102	0.051
	Carya_cf_Pterocarya	58	0.552	0.052	0.034	0.017	0	0.534	0.259	0.31	0.052	0.017	0
	Quercus_iberica	56	0.5	0.036	0.018	0	0	0.482	0.107	0.375	0.054	0	0.018
	Quercus_roburoides	54	0.611	0.148	0.167	0	0.037	0.519	0.111	0.352	0.13	0	0
	Sorbus_gabbrensis	52	0.462	0.096	0.038	0	0	0.404	0.115	0.231	0.096	0.038	0.038
	Tilia_cf_savania	47	0.745	0.043	0.043	0	0.0213	0.702	0.085	0.468	0.213	0.064	0
	Ulmus_campestris	45	0.644	0.111	0.089	0.022	0.0222	0.578	0.133	0.4	0.156	0.022	0
	Fagus_cf_pliocenica	44	0.545	0.136	0.068	0.045	0.0455	0.409	0.091	0.295	0.136	0.045	0.023
	Alnus_serrulata	38	0.553	0.079	0.026	0	0.0263	0.447	0.158	0.316	0.053	0	0.026
	cf_Magnolia	38	0.684	0.263	0.184	0.053	0.0263	0.474	0.053	0.158	0.289	0.026	0
	Prunus_mahaleb	38	0.5	0.026	0	0	0	0.5	0.132	0.263	0.105	0.079	0.026
	Betula_pubescens	36	0.556	0.056	0.056	0.028	0	0.528	0.167	0.25	0.083	0	0
	Quercus_libani	36	0.389	0.056	0.028	0	0	0.361	0.111	0.194	0.111	0	0.028
	Acer_monspessulanum	33	0.545	0.182	0.182	0	0	0.424	0.061	0.242	0.152	0.03	0
	Tilia_saportae	33	0.758	0.152	0.061	0.061	0.0303	0.697	0.182	0.515	0.212	0.03	0.03
	Carpinus_sp1	30	0.433	0.033	0.033	0	0	0.4	0.033	0.267	0.1	0.033	0
	Betula_sp1	29	0.552	0.034	0	0	0	0.517	0.172	0.241	0.103	0	0.034
	Betula_alnoides	28	0.5	0.036	0.036	0	0	0.464	0.107	0.321	0.036	0	0
	Zelkova_caprinifolia	28	0.536	0.036	0.036	0	0	0.5	0.179	0.25	0.107	0.036	0
	Crataegus_meischneri	27	0.407	0.148	0.074	0	0	0.259	0	0.148	0.074	0.037	0.074
	Quercus_castaneaefolia	27	0.481	0.074	0.074	0	0	0.444	0.037	0.333	0.074	0	0
	Quercus_praecastaneaefolia	26	0.538	0.077	0.038	0	0	0.462	0.077	0.308	0.077	0	0.038
	Acer_paleosaccharinum	25	0.68	0.2	0.16	0.04	0	0.56	0.16	0.28	0.2	0	0
	Acer_cappadocicum	24	0.5	0.125	0.125	0	0	0.375	0.083	0.208	0.042	0.042	0
	Juglans_sieboldiana	24	0.333	0.042	0.042	0	0	0.292	0.083	0.125	0.042	0.042	0
	Aesculus_hippocastanum	23	0.478	0.087	0.043	0	0.0435	0.391	0.217	0.13	0.043	0.043	0.043
	Populus_populina	23	0.348	0	0	0	0	0.348	0.043	0.217	0.13	0	0
	Betula_pendula	22	0.455	0.091	0.045	0	0	0.409	0.045	0.318	0.045	0.045	0
	Leguminosites_strausii	21	0.476	0.333	0.286	0.048	0	0.238	0.048	0.143	0.095	0	0
	Populus_gregorii	21	0.667	0.19	0.143	0.048	0.048	0.524	0.095	0.429	0.095	0	0
	Carpinus_caroliniana	20	0.45	0.15	0.15	0	0	0.45	0.1	0.35	0.1	0	0
	Corylus_avellana	20	0.45	0	0	0	0	0.45	0.05	0.45	0.1	0	0
	Populus_alba	20	0.35	0.1	0.1	0	0	0.25	0.1	0.15	0.05	0	0
Berga	Fagus_attenuata	148	0.25	0.101	0.081	0	0.02	0.169	0	0.162	0	0.014	0
	Quercus_sp	52	0.346	0.115	0.058	0	0	0.212	0	0.173	0.038	0.038	0.058
	Alnus_gaudinii	48	0.375	0.063	0.021	0	0.042	0.25	0.104	0.104	0.188	0.042	0
	Acer_tricuspidatum	45	0.2	0.022	0.022	0	0	0.178	0	0.178	0	0	0
	Acer_integerrinum	35	0.086	0.057	0.029	0	0.029	0.086	0	0.086	0	0	0
	Cercidiphylum_crenatum	34	0.147	0.088	0.088	0	0	0	0	0	0.059	0	0
	Zelkova_ungeri	26	0.115	0.038	0.038	0	0	0.077	0	0.077	0	0	0
Bernasso	Carpinus_orientalis	123	0.301	0.106	0.033	0.016	0.016	0.22	0.081	0.138	0.057	0.008	0
	Parrotia_persica	106	0.368	0.226	0.217	0.009	0.019	0.113	0.057	0.066	0.038	0	0
	Zelkova_ungeri	67	0.299	0.119	0.06	0.03	0.045	0.224	0.075	0.119	0.03	0.03	0
	Carya_minor	51	0.392	0.098	0.039	0.02	0.02	0.314	0.118	0.216	0.02	0	0
	Fraxinus_ornus	35	0.257	0.229	0.171	0	0.029	0.086	0.086	0	0.029	0	0
	Acer_monspessulanum	22	0.591	0.455	0.318	0	0.091	0.182	0.091	0.091	0.318	0.045	0
	Sorbus_domestica	22	0.591	0.409	0.318	0	0.045	0.182	0.091	0.045	0.091	0.045	0
