# Supplementary material for: Plant-insect interactions patterns in three European paleoforests of the late-Neogene—early-Quaternary
Source: PeerJ. 2018 Jun 20;6:e5075. doi: 10.7717/peerj.5075 (PMC6015487; doi:10.7717/peerj.5075)
Supplement: Supplemental Information 8 [file peerj-06-5075-s008.xlsx]

## Sheet: Data
ID	Galling	Mining	Margin	Hole	Skeletonization	Surface	P&S	Undamaged
Fagus_attenuata	0.0810810810810811	0	0	0.162162162162162	0	0.0135135135135135	0	0.75
Quercus_sp	0.0576923076923077	0	0	0.173076923076923	0.0384615384615385	0.0384615384615385	0.0576923076923077	0.653846153846154
Alnus_gaudinii	0.0208333333333333	0	0.104166666666667	0.104166666666667	0.1875	0.0416666666666667	0	0.625
Acer_tricuspidatum	0.0222222222222222	0	0	0.177777777777778	0	0	0	0.8
Acer_integerrinum	0.0285714285714286	0	0	0.0857142857142857	0	0	0	0.914285714285714
Cercidiphylum_crenatum	0.0882352941176471	0	0	0	0.0588235294117647	0	0	0.852941176470588
Taxodium_dubium	0.0689655172413793	0	0	0.0344827586206897	0	0	0	0.896551724137931
Zelkova_zelkovifolia	0.0384615384615385	0	0	0.0769230769230769	0	0	0	0.884615384615385

## Sheet: Significant
PC	Eigenvalue	% variance
1	0.0169629	71.202
2	0.00521435	21.887
3	0.00129525	5.4368
4	0.000282018	1.1838
5	5.48113E-05	0.23007
6	1.36008E-05	0.05709
7	6.69047E-07	0.0028083

## Sheet: Axes
	PC 1	PC 2	PC 3	PC 4	PC 5	PC 6	PC 7
Galling	-0.048168	0.014285	-0.68233	-0.51915	0.077826	0.4341	0.26054
Mining	2.3907E-18	9.6572E-17	2.2955E-17	-3.5898E-17	1.0182E-16	1.6155E-16	2.1707E-16
Margin	0.19775	0.29826	0.38338	-0.20442	0.70004	-0.018741	0.43905
Hole	0.28484	-0.72326	0.40148	-0.18008	-0.12824	0.40386	0.15033
Skeletonization	0.36685	0.60688	0.2152	0.029661	-0.49497	0.44912	0.056768
Surface	0.13132	0.018511	-0.058463	0.21943	0.48399	0.49918	-0.66889
P&S	0.071528	-0.11135	-0.26726	0.77852	0.089176	0.20303	0.50576
Undamaged	-0.84883	0.081737	0.32419	0.033777	-0.015886	0.39496	0.10162
