# Supplementary material for: Plant-insect interactions patterns in three European paleoforests of the late-Neogene—early-Quaternary
Source: PeerJ. 2018 Jun 20;6:e5075. doi: 10.7717/peerj.5075 (PMC6015487; doi:10.7717/peerj.5075)
Supplement: Supplemental Information 9 [file peerj-06-5075-s009.xlsx]

## Sheet: Data
ID	Galling	Mining	Margin	Hole	Skeletonization	Surface	P&S	Undamaged
Acer_monspessulanum	0.318182	0	0.0909091	0.0909091	0.318182	0.0454545	0	0.409091
Sorbus_domestica	0.318182	0	0.0909091	0.0454545	0.0909091	0.0454545	0	0.409091
Parrotia_persica	0.216981	0.00943396	0.0566038	0.0660377	0.0377358	0	0	0.632075
Fraxinus_ornus	0.171429	0	0.0857143	0	0.0285714	0	0	0.742857
Zelkova_ungeri	0.0597015	0.0298507	0.0746269	0.119403	0.0298507	0.0298507	0	0.701493
Carya_minor	0.0392157	0.0196078	0.117647	0.215686	0.0196078	0	0	0.607843
Carpinus_orientalis	0.0325203	0.0162602	0.0813008	0.138211	0.0569106	0.00813008	0	0.699187

## Sheet: Significant
PC	Eigenvalue	% variance
1	0.0388122	74.754
2	0.00850922	16.389
3	0.00396533	7.6374
4	0.0003412	0.65717
5	0.000250844	0.48314
6	4.09481E-05	0.078868

## Sheet: Axes
	PC 1	PC 2	PC 3	PC 4	PC 5	PC 6
Galling	0.58629	-0.51132	-0.10202	0.46648	-0.073744	0.38119
Mining	-0.041832	0.061053	-0.01022	-0.088667	-0.31894	0.46263
Margin	0.0069324	0.11998	-0.063785	-0.10508	0.87299	0.45194
Hole	-0.12061	0.69808	-0.13229	0.53601	-0.18344	0.31211
Skeletonization	0.44804	0.28924	0.84252	-0.0068396	0.036366	-0.043645
Surface	0.082244	0.038128	0.0052869	-0.64828	-0.309	0.50239
P&S	2.2869E-26	9.2358E-23	-9.3401E-21	-6.4275E-18	-7.6163E-17	-2.4937E-17
Undamaged	-0.65758	-0.38471	0.50799	0.23638	-0.016479	0.29105
